# Water-Soluble Extract of Pacific Krill Prevents Triglyceride Accumulation in Adipocytes by Suppressing PPAR $\gamma$ and C/EBP $\alpha$ Expression

Hidetoshi Yamada<sup>1\*</sup>, Tomohiro Ueda<sup>2</sup>, Akira Yano<sup>1</sup>

<sup>1</sup> Iwate Biotechnology Research Center, Kitakami, Iwate, Japan, <sup>2</sup> Iwate Fisheries Technology Center, Kamaishi, Iwate, Japan

## Abstract

**Background:** Pacific Krill (*Euphausia pacifica*) are small, red crustaceans, similar to shrimp, that flourish in the North Pacific and are eaten in Japan.

**Methods and Findings:** We investigated the effect of a water-soluble extract of Pacific Krill on adipocytes and discovered that this extract suppressed triglyceride accumulation in adipocytes. Furthermore, the water-soluble extract of Pacific Krill suppressed the expression of two master regulators of adipocyte differentiation, peroxisome proliferator-activated receptor gamma (PPAR $\gamma$ ) and CCAAT enhancer binding protein alpha (C/EBP $\alpha$ ). C/EBP $\beta$  promotes PPAR $\gamma$  and C/EBP $\alpha$  expression, but the water-soluble extract of Pacific Krill did not inhibit the expression of C/EBP $\beta$  or C/EBP $\beta$ -mediated transcriptional activation. The Pacific Krill extract was more effective than a PPAR $\gamma$  antagonist in suppressing PPAR $\gamma$  and C/EBP $\alpha$  expression.

**Conclusions:** These results indicated that the water-soluble extract of Pacific Krill was not simply a PPAR $\gamma$  antagonist, but that it prevented triglyceride accumulation in adipocytes by suppression of PPAR $\gamma$  and C/EBP $\alpha$  via a pathway that is independent of C/EBP $\beta$ .

**Citation:** Yamada H, Ueda T, Yano A (2011) Water-Soluble Extract of Pacific Krill Prevents Triglyceride Accumulation in Adipocytes by Suppressing PPAR $\gamma$  and C/EBP $\alpha$  Expression. PLoS ONE 6(7): e21952. doi:10.1371/journal.pone.0021952

**Editor:** Joseph Najbauer, City of Hope National Medical Center and Beckman Research Institute, United States of America

**Received:** January 8, 2011; **Accepted:** June 15, 2011; **Published:** July 7, 2011

**Copyright:** © 2011 Yamada et al. This is an open-access article distributed under the terms of the Creative Commons Attribution License, which permits unrestricted use, distribution, and reproduction in any medium, provided the original author and source are credited.

**Funding:** This work was supported by a fund from the Basic Biotechnology Project of Iwate Prefecture, Japan, and Grants-in-Aid from the Sanriku Foundation. The funders had no role in study design, data collection and analysis, decision to publish, or preparation of the manuscript.

**Competing Interests:** The authors have declared that no competing interests exist.

\* E-mail: hyamada@ibr.or.jp

## Introduction

Obesity increases the likelihood of various diseases, including type 2 diabetes and cardiovascular diseases. Foods that suppress absorption of glucose and lipids [1,2] and increase the metabolism of fat [3–6] are regarded as anti-obesity foods. Several anti-obesity foods were studied to identify the bioactive compounds and the physiological function of the compounds that are responsible for their anti-obesity effects. Foods that prevent fat accumulation also seem to be effective in preventing obesity, but only a few studies have investigated the foods that specifically prevent fat accumulation.

Body fat is mainly stored in adipose tissue. Adipose tissue is generally regarded as mesodermal in origin, and mature adipocytes develop from mesenchymal stem cells (MSCs) via a preadipocyte stage [7]. Increases in adipose tissue mass seem to depend on adipocyte hypertrophy because mature adipocytes have low proliferative potential. Recently, however, it was shown that, in adults, the number of adipocytes could increase by adipogenesis, the differentiation of preadipocytes to mature adipocytes [8]. Adipogenesis and adipocyte hypertrophy may occur reiteratively as an individual becomes obese; therefore, inhibition of adipogenesis may be an effective approach to the prevention of fat accumulation.

Adipogenesis is regulated by PPAR $\gamma$  and C/EBP $\alpha$  expression [9]. PPAR $\gamma$  is a nuclear hormone receptor that heterodimerizes

with the retinoid X receptor (RXR). The PPAR $\gamma$ -RXR complex promotes the expression of target genes and adipocyte differentiation. C/EBP $\alpha$  is a transcription factor that is required for adipocyte maturation [9].

Pacific Krill are small, red crustaceans, similar to shrimp, that flourish in the North Pacific, and they have been part of Japanese diet for seventy years. They have a high content of long-chain polyunsaturated fatty acids, including eicosapentaenoic acid (EPA) and docosahexaenoic acid (DHA), and several studies report that Krill Oil has anti-inflammatory effects and that it decreases serum lipid levels [10–16]. Krill Oil has been studied as a bioactive food, but other constituents of Krill have not been studied intensively. In the present study, we investigated the effect of the water-soluble extract of Pacific Krill on adipocytes and discovered that this extract prevented triglyceride accumulation in adipocytes by suppressing adipogenesis.

## Results

### The water-soluble extract of Pacific Krill suppressed triglyceride accumulation in mouse adipocytes

To examine the effect of the water-soluble extract of Pacific Krill on adipocytes, we cultured 3T3-F442A cells in the presence of 10  $\mu$ g/ml of insulin and 500  $\mu$ g/ml of the water-soluble extract of Pacific Krill for 10 days. We stained 3T3-F442A cells induced to

differentiate as adipocytes with Oil Red O and counted the number of differentiated adipocytes that accumulated triglyceride within the cultures. The water-soluble extract of Pacific Krill suppressed triglyceride accumulation in a dose-dependent manner (Fig. 1). There were few adipocytes that had accumulated triglycerides in the cultures treated with 500  $\mu\text{g}/\text{ml}$  of the water-soluble extract (Fig. 1B).

### The water-soluble extract of Pacific Krill did not influence the proliferation or differentiation potential of preadipocytes

In adipocytes, differentiation and cell cycle progression regulate each other [17–19]. To examine the effect of the water-soluble extract of Pacific Krill on preadipocytes proliferation, we cultured 3T3-F442A cells in insulin-free medium and counted the number of cells in the culture every 3 days to assess the influence of the water-soluble extract on preadipocyte proliferation. The water-soluble extract did not inhibit preadipocyte proliferation (Fig. 2A). To determine whether the water-soluble extract affected the differentiation potential of preadipocytes, we cultured 3T3-F442A cells cultured in insulin-free medium containing 500  $\mu\text{g}/\text{ml}$  of the water-soluble extract of Pacific Krill for 12 days and then induced adipocyte differentiation by adding insulin (10  $\mu\text{g}/\text{ml}$ ) to the cultures (Fig. S4B).

3T3-F442A cell cultures pretreated with 500  $\mu\text{g}/\text{ml}$  of the water-soluble extract and the control cultures had similar numbers of cell that accumulate triglyceride (Fig. 2B, C).

### The water-soluble extract of Pacific Krill suppressed PPAR $\gamma$ and C/EBP $\alpha$ expression

PPAR $\gamma$  and C/EBP $\alpha$  expression are induced during adipogenesis [9]; therefore, we measured PPAR $\gamma$  and C/EBP $\alpha$  expression in 3T3-F442A cells cultured with 10  $\mu\text{g}/\text{ml}$  of insulin for 7 days. PPAR $\gamma$  and C/EBP $\alpha$  mRNA expression were induced in the control 3T3-F442A cells, and PPAR $\gamma$  and C/EBP $\alpha$  mRNA levels were significantly lower in the 3T3-F442A cells treated with the water-soluble extract of Pacific Krill than in the control cultures (Figs. 3A, S1). Moreover, PPAR $\gamma$  and C/EBP $\alpha$  protein levels were lower in the extract-treated cultures than in the control cultures (Fig. 3B). The expression of aP2, a gene induced by PPAR $\gamma$ , and Glut4, a marker of mature adipocytes, were also lower in cultures treated with the water-soluble extract Pacific Krill than in control cultures (Fig. 3A). We also examined water-soluble extract of Antarctic Krill (*Euphausia superba*). The water-soluble extract of Antarctic Krill suppressed triglyceride accumulation and PPAR $\gamma$  expression, but the activity was lower than the Pacific Krill extract (Fig. S2).

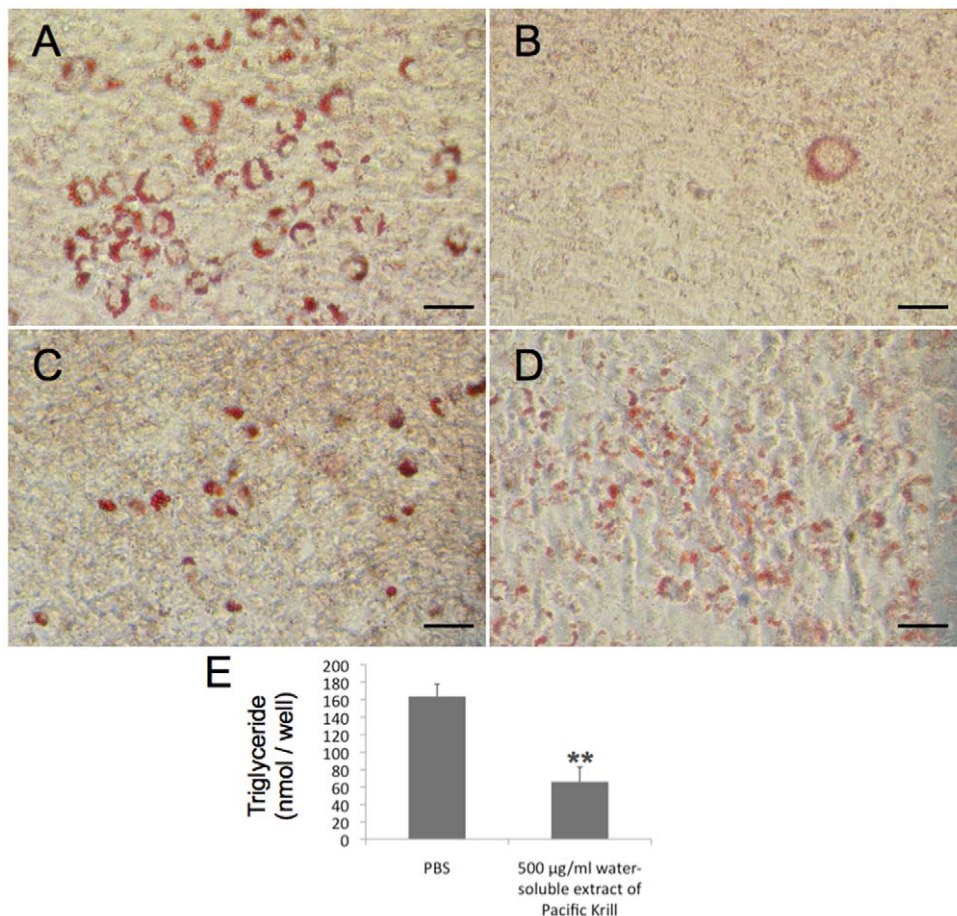

**Figure 1. Effect of the water-soluble extract of Pacific Krill on adipocyte differentiation.** Oil Red O staining of 3T3-F442A cells that were induced to differentiate as adipocytes and treated with (A) PBS, (B) 500  $\mu\text{g}/\text{ml}$ , (C) 50  $\mu\text{g}/\text{ml}$ , or (D) 5  $\mu\text{g}/\text{ml}$  of the water-soluble extract of Pacific Krill for 10 days. Scale bar, 50  $\mu\text{m}$ . (E) Triglyceride measurements. Plotted values represent the mean value  $\pm$  SD from ten independent cultures. \*\* $p < 0.01$ . doi:10.1371/journal.pone.0021952.g001

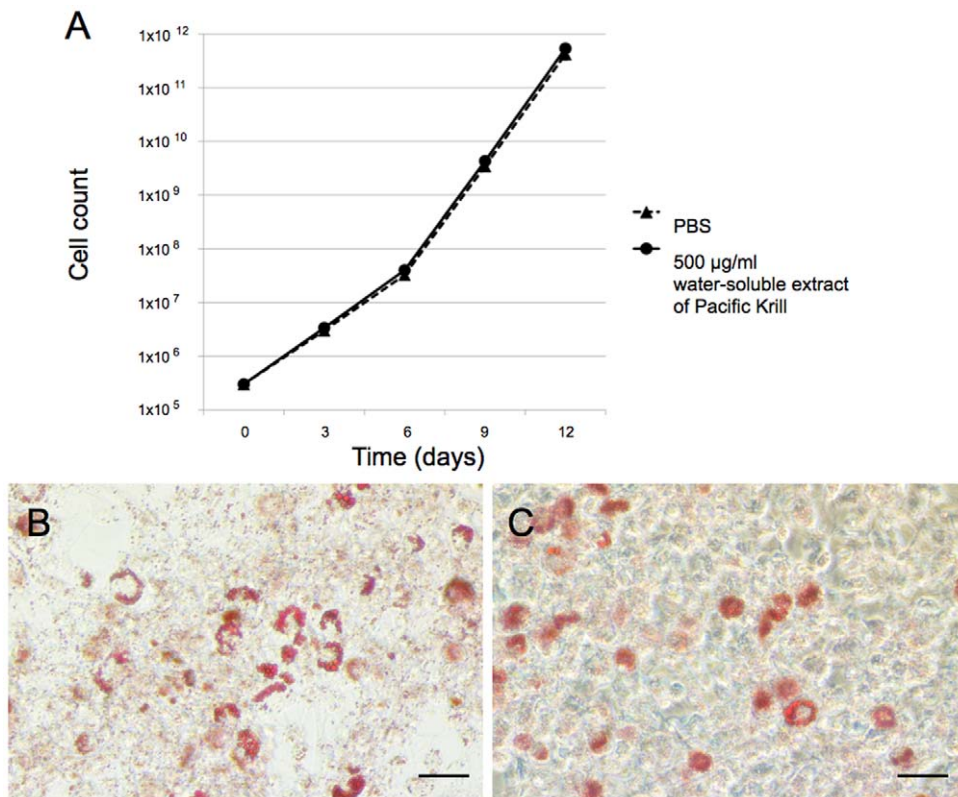

**Figure 2. Effects of the water-soluble extract of Pacific Krill on preadipocytes.** (A) Growth curve of preadipocytes cultured with insulin-free medium containing PBS ( $\blacktriangle$ ) or 500  $\mu\text{g/ml}$  of the water-soluble extract of Pacific Krill ( $\bullet$ ). The data points represent the mean value  $\pm$  SD from four independent experiments. (B and C) Oil Red O staining of 3T3-F442A. These cells were cultured in insulin-free medium containing (B) PBS or (C) 500  $\mu\text{g/ml}$  of the water-soluble extract of Pacific Krill for 12 days and then induced to differentiate as adipocytes by adding insulin to the culture medium. Scale bar, 50  $\mu\text{m}$ .

doi:10.1371/journal.pone.0021952.g002

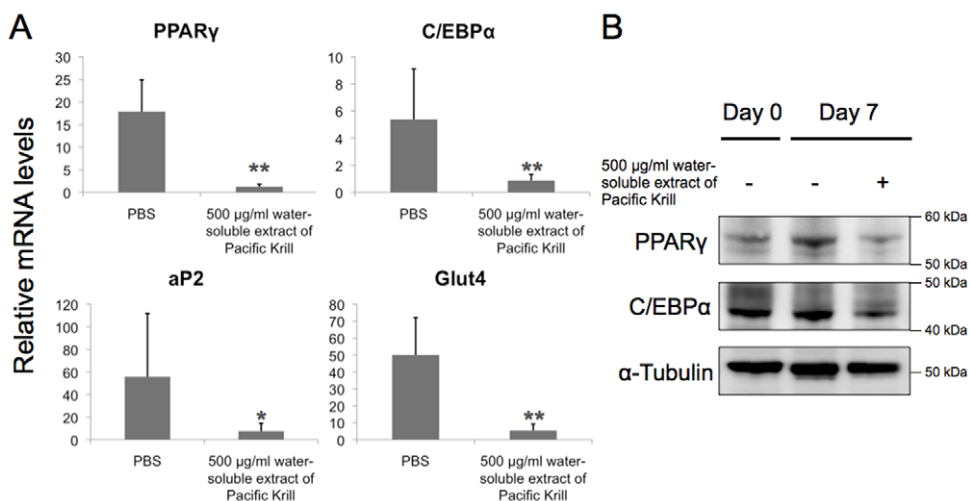

**Figure 3. Analysis of PPAR $\gamma$  and C/EBP $\alpha$  mRNA and protein levels in 3T3-F442A cells.** (A) qRT-PCR analysis of RNA extracts from 3T3-F442A cells induced to differentiate as adipocytes for 7 days. Plotted values represent the mean value  $\pm$  SD from five independent cultures. \*\*\* $p < 0.01$ ; \* $p < 0.05$ . (B) Protein extracts from 3T3-F442A cells induced to differentiate as adipocytes for 7 days were analyzed by immunoblotting.

doi:10.1371/journal.pone.0021952.g003

### The water-soluble extract of Pacific Krill inhibited adipocyte differentiation in human mesenchymal stem cells

We examined whether the water-soluble extract of Pacific Krill also inhibited adipocyte differentiation of human mesenchymal stem cells (hMSCs). After 13 days of adipocyte differentiation, we added 500  $\mu\text{g}/\text{ml}$  of the water-soluble extract of Pacific Krill to hMSC medium and allowed the cultures to grow. We then measured PPAR $\gamma$  and C/EBP $\alpha$  mRNA expression levels in these hMSCs cultures using qRT-PCR, and we stained hMSCs cultures with Oil Red O. The water-soluble extract of Pacific Krill suppressed PPAR $\gamma$  and C/EBP $\alpha$  expression in hMSC cultures (Fig. 4C), and the number of cells that accumulated triglycerides were lower in the extract-treated cultures than in the control cultures (Fig. 4A, B).

### C/EBP $\beta$ expression and C/EBP $\beta$ -mediated transcriptional activation were not affected by the water-soluble extract of Pacific Krill

C/EBP $\beta$  binds to the PPAR $\gamma$  and C/EBP $\alpha$  promoters and activates expression of both genes [20–22]. We assumed that the water-soluble extract of Pacific Krill decreased the expression of C/EBP $\beta$  and C/EBP $\beta$ -mediated transcriptional activation. To test these hypotheses, we measured C/EBP $\beta$  mRNA expression levels and protein levels in extract-treated and control cultures, but the C/EBP $\beta$  mRNA and protein levels were similar in control and extract-treated cultures (Fig. 5A, B). Next, we performed ChIP analysis and luciferase reporter assays to examine C/EBP $\beta$ -mediated transcriptional activation. The amount of C/EBP $\beta$  bound to the PPAR $\gamma$  and C/EBP $\alpha$  promoters was similar in control and extract-treated cells (Fig. 5C). The reporter activity of

pC/EBP RE-TK hRLuc(F) construct was similar in control and extract-treated cultures (Fig. 5D).

### The water-soluble extract of Pacific Krill suppressed PPAR $\gamma$ and C/EBP $\alpha$ expression more than a PPAR $\gamma$ antagonist did

The PPAR $\gamma$  antagonists bind to PPAR $\gamma$  selectively and inhibit PPAR $\gamma$  function [23]. Because PPAR $\gamma$  and C/EBP $\alpha$  activate each other, the PPAR $\gamma$  antagonists suppress PPAR $\gamma$  and C/EBP $\alpha$  expression. To assess whether the extract functioned as a PPAR $\gamma$  antagonist, we compared the effects of the water-soluble extract with those of a PPAR $\gamma$  antagonist (T0070907). Triglyceride accumulation was suppressed by 10  $\mu\text{M}$  T0070907 (Fig. 6C), and 90  $\mu\text{M}$  T0070907 suppressed the expression of aP2 to the levels found in cultures treated with the water-soluble extract of Pacific Krill (Fig. 6D). However, while the water-soluble extract of Pacific Krill suppressed more than 95% of PPAR $\gamma$  and C/EBP $\alpha$  expression, T0070907 suppressed less than 70% of PPAR $\gamma$  and C/EBP $\alpha$  expression (Fig. 6D).

### Transcriptome analysis of 3T3-F442A cells treated with the water-soluble extract of Pacific Krill

To identify the genes—other than PPAR $\gamma$  and C/EBP $\alpha$ —that were affected by the water-soluble extract of Pacific Krill, we analyzed the transcriptome of 3T3-F442A cells using Super SAGE (serial analysis of gene expression). We identified 65 genes with expression levels that may be affected by treatment with the water-soluble extract by comparing the transcriptome of control 3T3-F442A cells with the transcriptome of 3T3-F442A cells cultured with the water-soluble extract. We used qRT-PCR to confirm that these 65 genes were affected by treatment with the extract. We

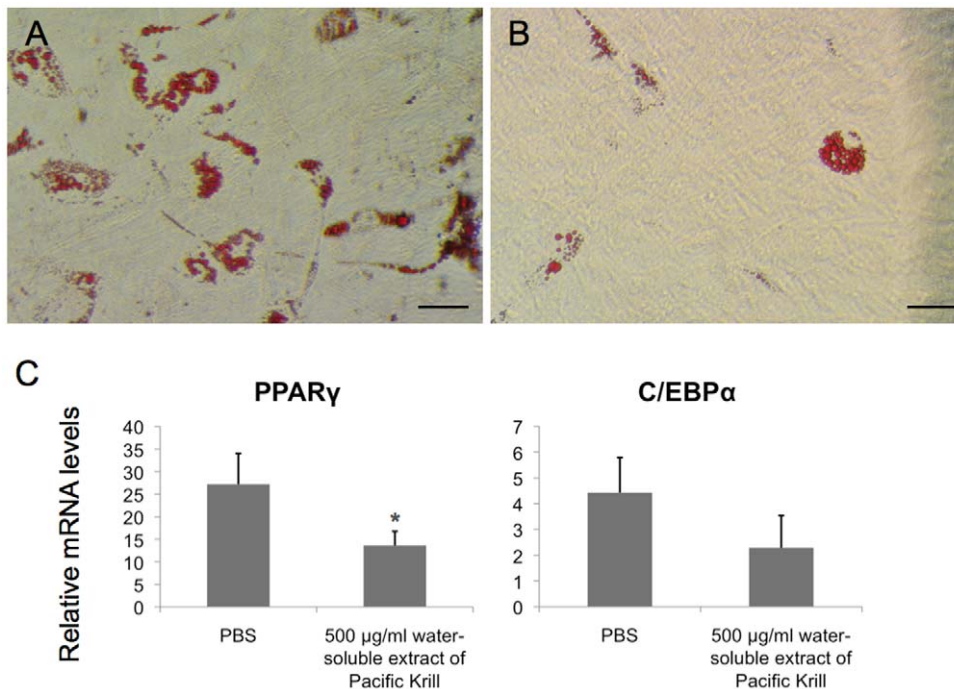

**Figure 4. Influence of the water-soluble extract of Pacific Krill on adipocyte differentiation in hMSCs.** After 13 days of adipocyte differentiation, (A) PBS or (B) 500  $\mu\text{g}/\text{ml}$  of the water-soluble extract of Pacific Krill were added to the cell cultures. (A and B) The Oil Red O staining of UCB TERT-21 cells induced to differentiate as adipocytes for 22 days. Scale bar, 50  $\mu\text{m}$ . (C) RNA extracts from UCB TERT-21 cells induced to differentiate as adipocytes for 18 days were analyzed by qRT-PCR. Plotted values represent the mean value  $\pm$  SD from four independent cultures. \* $p < 0.05$ . The  $p$  value of C/EBP $\alpha$  was 0.059. doi:10.1371/journal.pone.0021952.g004

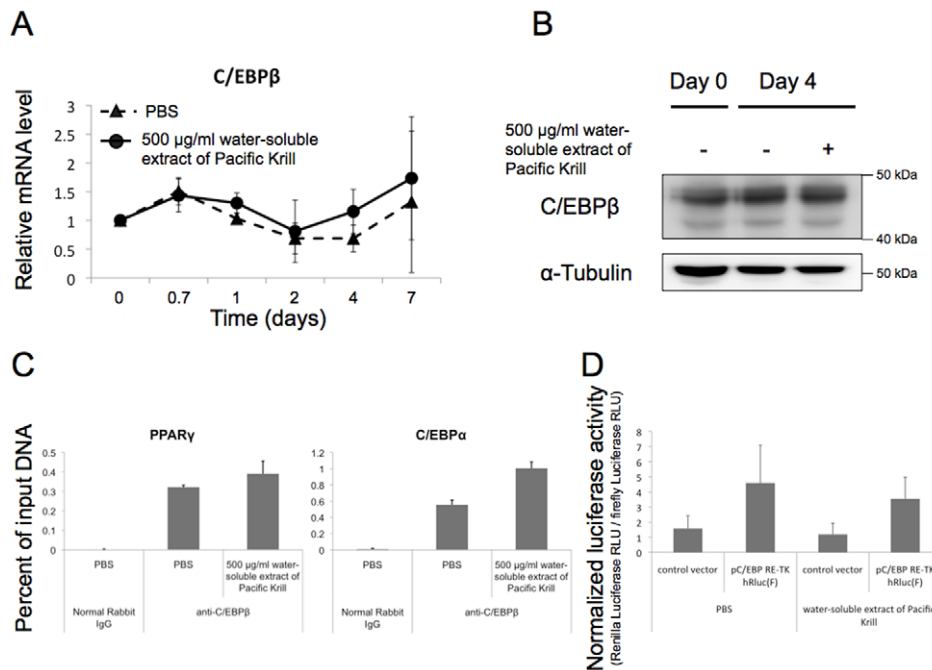

**Figure 5. Effects of the water-soluble extract of Pacific Krill on C/EBPβ expression and C/EBPβ-mediated transcriptional activation.** (A) qRT-PCR analysis of RNA extracts from 3T3-F442A cells induced adipocyte differentiation. Plotted values are the mean value  $\pm$  SD from five independent cultures. (B) Protein extracts from 3T3-F442A cells induced to differentiate as adipocyte for 4 days were analyzed by immunoblotting. (C) CHIP analysis of C/EBPβ. CHIP samples were extracted from the 3T3-F442A cells induced to differentiate as adipocyte and cultured with or without 500 µg/ml of the water-soluble extract of Pacific Krill for 4 days. Plotted values are the mean value  $\pm$  SD from three independent experiments. Normal Rabbit IgG was used as a negative control. (D) Luciferase reporter assay. The renilla luciferase activity was normalized to firefly luciferase activity. Plotted values are the mean value  $\pm$  SD from eight independent experiments. doi:10.1371/journal.pone.0021952.g005

identified five genes with expression levels that were increased by the water-soluble extract (Fig. 7) and seven genes with expression levels that were decreased (Fig. 8).

## Discussion

We discovered that the water-soluble extract of Pacific Krill prevented triglyceride accumulation by suppressing PPAR $\gamma$  and C/EBP $\alpha$  expression (Figs. 1–4). A study of PPAR $\gamma^{+/-}$  mice shows that appropriate reduction in PPAR $\gamma$  expression prevents obesity induced by a high-fat diet [24]; therefore, inhibition of PPAR $\gamma$  expression may be an effective way to prevent obesity. However, constitutive or complete elimination of PPAR $\gamma$  results in damage to adipose tissue, and this tissue plays a central role in maintaining lipid homeostasis, energy balance, and producing leptin and adiponectin [25–29]. Therefore, suppression, rather than elimination of PPAR $\gamma$  expression, may be a better way to prevent obesity. The water-soluble extract of Pacific Krill did not affect proliferation or differentiation of preadipocytes (Fig. 2) and suppressed the expression of PPAR $\gamma$  in adipocytes (Fig. 3). Consumption of the water-soluble extract of Pacific Krill may be a safe and effective way to prevent obesity.

Decreased C/EBPβ expression and DNA binding, inhibition of PPAR $\gamma$  function, and activation of the Wnt/ $\beta$ -catenin pathway suppresses PPAR $\gamma$  and C/EBP $\alpha$  expression [9,23,29–32]. However, the water-soluble extract of Pacific Krill did not decrease C/EBPβ expression or C/EBPβ-mediated transcriptional activation (Fig. 5), and the extract did not increase the expression of Nr2f2, a gene that acts downstream of Wnt/ $\beta$ -catenin signal to silence PPAR $\gamma$  expression (Fig. S3). Moreover, the extract suppressed PPAR $\gamma$  and C/EBP $\alpha$  expression more

than the PPAR $\gamma$  antagonist did (Fig. 6). These results indicate that the water-soluble extract of Pacific Krill was not only a PPAR $\gamma$  antagonist, but that it suppressed the expression of PPAR $\gamma$  and C/EBP $\alpha$  via a pathway other than those mediated by C/EBPβ or Wnt/ $\beta$ -catenin.

The water-soluble extract of Pacific Krill induced expression of five genes—Angptl7, Fgf7, Tgfb1, Hgf, and Pak3; and it suppressed expression of seven genes—Fgfr2, Postn, Id1, Pknox2, Gsta4, Ada, and Ldlrad3. FGF signals positively regulate adipocyte differentiation [33–36]. While the expression of Fgf7 was increased approximately two-fold in cells treated with the extract, the expression of Fgfr2 was decreased to approximately one-seventh of the level found in control cells. These findings imply that FGF signaling was blocked in 3T3-F442A cells treated with the extract. TGF $\beta$  signal function is antagonistic to PPAR $\gamma$ , and TGF $\beta$  induces myoblast differentiation [37]. We propose that decreased FGF signaling and increased TGF $\beta$  signaling resulted suppression PPAR $\gamma$  and C/EBP $\alpha$  expression.

Krill Oil has been identified as a bioactive compound, and its functions have been studied, but other components of the krill have not been studied. This study is the first to report that the water-soluble extract of Krill contains bioactive compound. Furthermore, there are only a few reports that indicate that the water-soluble components extracted from a food can suppress the expression of PPAR $\gamma$ ; therefore, the bioactive material contained in the water-soluble extract of Krill is of great interest. Previous studies [10–13,38–42] and the present results indicate that Krill is beneficial to human health because it has anti-inflammatory effects, decreases serum lipid levels, and prevents fat accumulation in adipocytes.

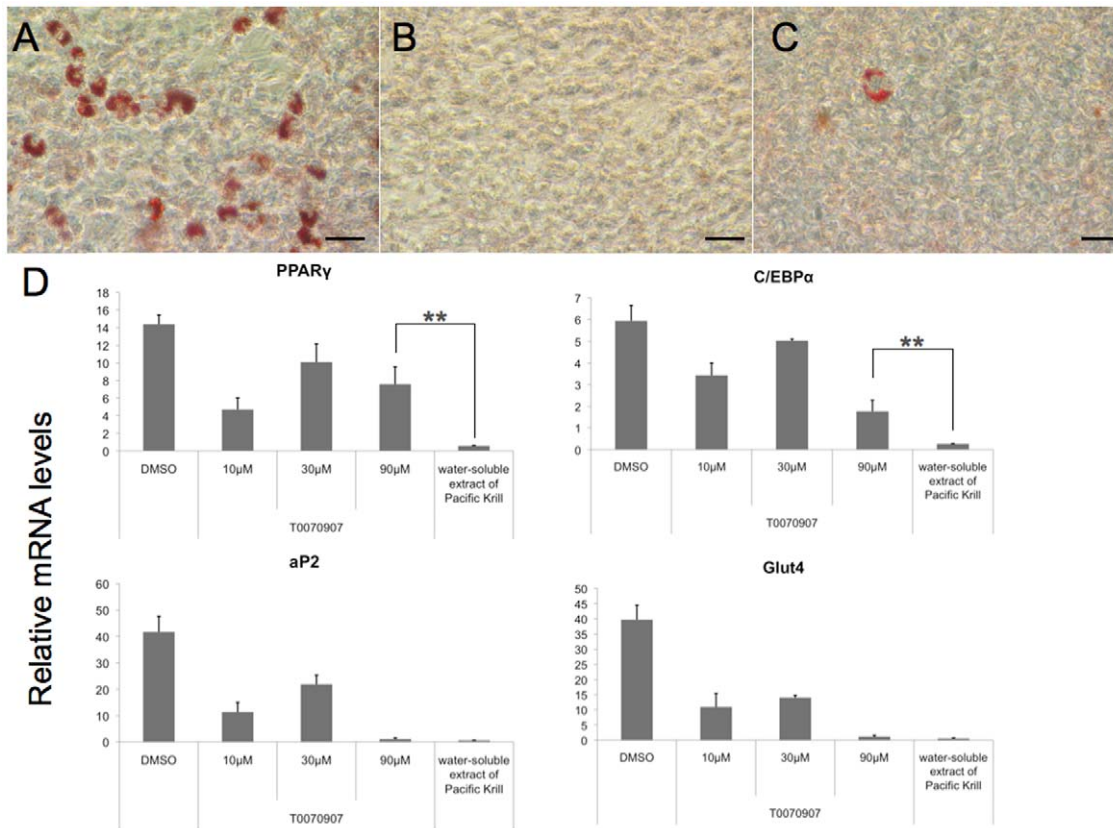

**Figure 6. Comparison of effects of the water-soluble extract and a PPAR $\gamma$  antagonist on adipocyte differentiation.** Oil Red O staining of 3T3-F442A cells induced to differentiate as adipocytes and treated with (A) DMSO, (B) 500  $\mu$ g/ml of the water-soluble extract of Pacific Krill, or (C) 10  $\mu$ M T0070907 for 10 days. Scale bar, 50  $\mu$ m. (D) Analysis of mRNA levels in 3T3-F442A cells. RNA extracts from 3T3-F442A cells induced to differentiate as adipocytes for 7 days were analyzed by qRT-PCR. Plotted values are the mean value  $\pm$  SD from four independent cultures. \*\* $p$ <0.01. doi:10.1371/journal.pone.0021952.g006

## Materials and Methods

### Water-soluble extract of Pacific Krill

A mixture of Pacific Krill and distilled water (3:1 by volume) was homogenized, and the resulting homogenate was centrifuged at 8000 rpm for 30 min. The supernatant was filtered and lyophilized.

### Cell culture

3T3-F442A cells from a mouse preadipocyte cell line (DS Pharma Biomedical Co., Ltd., Osaka, Japan) were cultured in DMEM containing 10% Fetal Bovine Serum (FBS) and Antibiotic Antimycotic Solution (Sigma-Aldrich, St Louis, MO, USA). 3T3-F442A cells were grown until confluent on type II collagen-coated dishes (Corning, Corning, NY, USA), and confluent cells were induced to differentiate into adipocytes with 10  $\mu$ g/ml of insulin (Sigma-Aldrich). The culture conditions used in individual experiments are summarized in Figure S4.

UCB TRET-21 cells, immortalized human Mesenchymal Stem Cells, (JCRB Cell Bank, Osaka, Japan) were cultured in DMEM containing 10% Mesenchymal Stem Cell-qualified FBS (Invitrogen, Carlsbad, CA, USA) and Antibiotic Antimycotic Solution (Sigma-Aldrich). UCB TRET-21 cells were induced to differentiate into adipocytes with 10  $\mu$ g/ml of insulin, 1  $\mu$ M dexamethasone (Wako, Osaka, Japan), 200  $\mu$ M indomethasin (Wako), and 500  $\mu$ M IBMX, 3-isobutyl-1-methylxanthine (Wako). The culture conditions used in individual experiments are summarized in Figure S4.

### Quantitative real-time PCR (qRT-PCR)

Total RNA was extracted from 3T3-F442A cells or UCB TERT-21 cells with an RNeasy kit (QIAGEN, Tokyo, Japan) and used to synthesize cDNA with the PrimeScript RT reagent kit (Takara, Shiga, Japan); all kits were used according to the manufacturers' recommendations. Quantitative real-time PCR was performed with the gene specific primers listed in Tables S1 and S2 and Fast SYBER Green master mix (Applied Biosystems). The qRT-PCR data from 3T3-F442A cells were normalized to RPLP0. The qRT-PCR data from UCB TERT-21 cells were normalized to Actin $\beta$ . The results are expressed as fold increase compared to non-induced 3T3-F442A cells or UCB TRET-21 cells.

### Oil Red O Staining

The cells induced to differentiate as adipocytes were fixed with 10% formalin (Wako) at room temperature for 10 min. Fixed cells were washed with PBS and isopropanol solution and then stained with 180 mg/ml of Oil Red O for 40 min. The Oil Red O-stained cells were observed with a Nikon microscope ( $\times$ 400) after washing. An Adipogenesis Assay kit (Bio Vision, Mountain View, CA, USA) was used to measure triglyceride content.

### Super serial analysis of gene expression (SAGE)

Super SAGE was performed as previously described [43–45]. Briefly, total RNA was extracted from 3T3-F442A cells with an RNeasy kit. Double-stranded cDNA was synthesized with

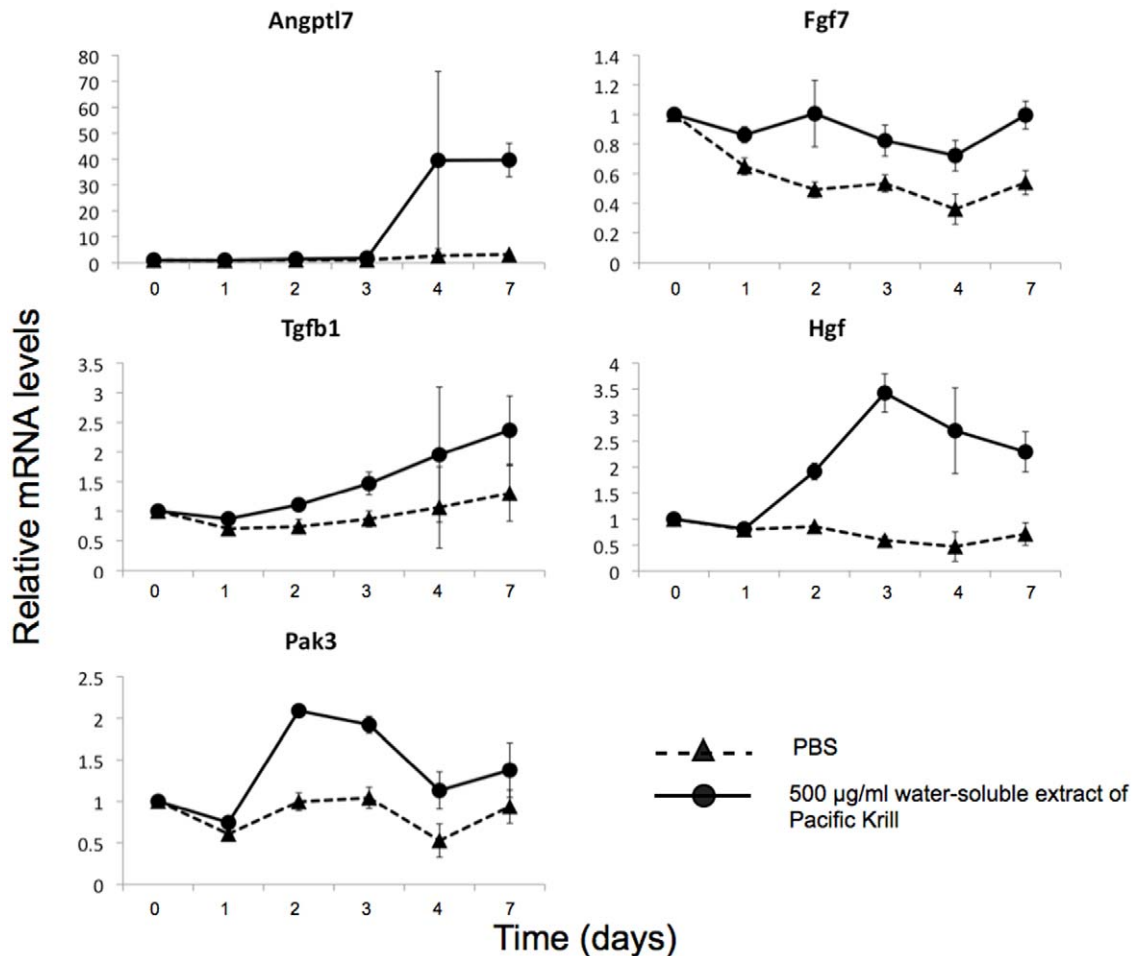

**Figure 7. The genes activated by the water-soluble extract of Pacific Krill.** qRT-PCR analysis of RNA extracts from 3T3-F442A cells induced to differentiate as adipocytes and treated with PBS (▲) or 500 µg/ml of the water-soluble extract of Pacific Krill (●). Plotted values are the mean value  $\pm$  SD from four independent cultures.  
doi:10.1371/journal.pone.0021952.g007

biotinylated oligo-dT primer and Double-Stranded cDNA Synthesis kit (Invitrogen) from 5 µg of total RNA. Double-stranded cDNAs were digested with NlaIII (New England Biolabs, Beverly, MA, USA) after purification using a PCR purification kit (QIAGEN). Double-stranded cDNAs digested with NlaIII were bound to Dynabeads M270 streptavidin (Invitrogen). Adapter sequence 2 containing an EcoP15I restriction site was ligated to the double-stranded cDNAs that were bound to Dynabeads. Double-stranded cDNAs were digested with EcoP15I (New England Biolabs). Double-stranded cDNAs digested with EcoP15I and separated from Dynabeads were tag sequences. Adaptor sequence 1 containing index sequence was ligated to tag sequences. Tag sequences were then amplified by PCR and gel purified. Finally, tag sequences were analyzed using a Genome Analyzer II (Illumina, San Diego, CA, USA).

### Super SAGE data analysis

Sorting of sequence reads (35-bases) based on index sequence and the subsequent extraction of 26-base reference sequences from reads was conducted using a script written in C++. The reference sequences were compared to the NCBI mouse transcript database using the BLAST program. We searched the reference sequences, which completely matched the mouse

cDNA sequence, Tags. The total number of analyzed reads and tags are shown in Table S3.

### Chromatin immunoprecipitation (ChIP)

ChIP was performed with a ChIP Expression kit (Active motif, Tokyo, Japan). Anti-C/EBP $\beta$  (Santa Cruz, Santa Cruz, CA, USA) and normal rabbit IgG (Santa Cruz) were used for ChIP. ChIP samples were analyzed by gene-specific quantitative real-time PCR. The primers used to amplify PPAR $\gamma$  promoter sequences were 5'-CACGCCCTCACAGAACAGTGAA-3' and 5'-GCACTGTCCTGACTGAGAGCCA-3'. The primers used to amplify C/EBP $\alpha$  promoter sequences were 5'-ATGCTCCCCACTCACCGCCT-3' 5'-GCCCCCTGGTGTCCAAACGG-3'. The results are presented as percent of input DNA.

### Plasmids

We used the pC/EBP RE-TK hRluc(F) vector (RIKEN BRC, Ibaraki, Japan), which uses the nucleotide sequence of the C/EBP response element (5'-GATCCGCCAATGCCAATGCCAATG-3') found upstream of minimal thymidine kinase (TK) promoter in the renilla luciferase reporter construct. The control vector was pmutant C/EBP RE-TK hRluc(R) vector (RIKEN BRC), which contains the mutant C/EBP response element(5'-ACTATGACTATGAC-

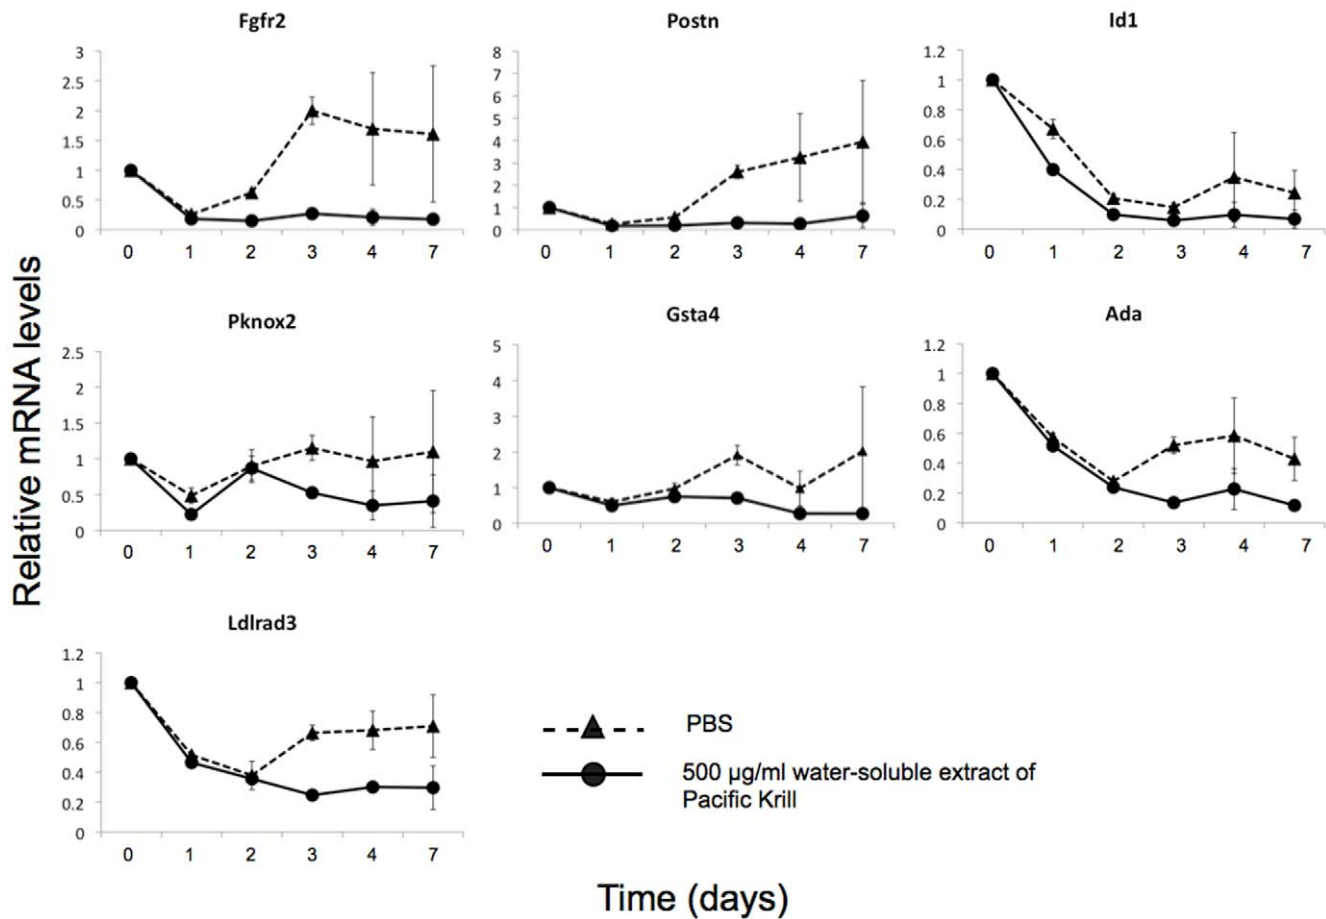

**Figure 8. The genes suppressed by the water-soluble extract of Pacific Krill.** qRT-PCR analysis of RNA extracts from 3T3-F442A cells induced to differentiate as adipocytes and treated with PBS (▲) or 500 µg/ml of the water-soluble extract of Pacific Krill (●). Plotted values are the mean value  $\pm$ SD from four independent cultures.  
doi:10.1371/journal.pone.0021952.g008

TATG -3') upstream of minimal thymidine kinase (TK) promoter. The luciferase reporter assay normalization vector pCMV-Luc contains the firefly luciferase gene driven by the cytomegalovirus promoter.

#### Luciferase reporter assay

The firefly luciferase normalization vector pCMV-Luc (0.3 µg) and the renilla luciferase reporter construct pC/EBP RE-TK hRluc (F) (3 µg) were co-transfected using Lipofectamin 2000 (Invitrogen) into the 3T3-F442A cells that had been induced to differentiate into adipocytes for 3 days. One day after transfection, the cells were harvested using passive lysis buffer (Promega). Renilla and firefly luciferase activities were determined using a dual luciferase assay system (Promega).

#### Supporting Information

**Figure S1 Dose-response curve for the effects of water-soluble extract of Pacific Krill on suppression of PPAR $\gamma$  gene expression.** RNA extracts from 3T3-F442A cells induced to differentiate as adipocytes and treated with the water-soluble extract of Pacific Krill for 7 days were analyzed by qRT-PCR. (TIFF)

**Figure S2 Effects of the water-soluble extract of Antarctic krill on adipocyte differentiation.** Oil Red O staining of

3T3-F442A cells that were induced to differentiate as adipocytes and treated with (A) PBS or (B) 3 mg/ml of the water-soluble extract of Antarctic Krill for 10 days. Scale bar, 50 µm. (C) qRT-PCR analysis of RNA extracts from 3T3-F442A cells induced to undergo adipocyte differentiation with the water-soluble extract of Antarctic krill for 7 days. Plotted values are the mean value from three independent cultures.

(TIFF)

**Figure S3 Influences of the water-soluble extract of Pacific Krill on Nr2f2 expression.** qRT-PCR analysis of RNA extracts from 3T3-F442A cells induced to undergo adipocyte differentiation for 7 days. Plotted values are the mean value  $\pm$  SD from three independent cultures.

(TIFF)

**Figure S4 Flow chart of culture conditions (A).** The culture condition of 3T3-F442A cells used to generate the data presented in Figures 1, 3, 5–8. (B) The culture condition of 3T3-F442A cells used to generate the data presented in Figure 2. (C) The culture condition of UCB TERT-21 cells used to generate the data presented in Figure 4.

(TIFF)

**Table S1 The list of primers used for gene expression analysis in 3T3-F442A cells.**

(DOC)



**Table S2 The list of primers used for gene expression analysis in UCB TERT-21 cells.**

(DOC)

**Table S3 Total number of analyzed reads and tags in the Super SAGE analysis.**

(DOC)

**References**

- Wakabayashi S, Kishimoto Y, Matsuoka A (1995) Effects of indigestible dextrin on glucose tolerance in rats. *J Endocrinol* 144: 533–8.
- Han LK, Takaku T, Li J, Kimura Y, Okuda H (1999) Anti-obesity action of oolong tea. *Int J Obes Relat Metab Disord* 23: 98–105.
- Lagouge M, Argmann C, Gerhart-Hines Z, Meziane H, Lerin C, et al. (2006) Resveratrol improves mitochondrial function and protects against metabolic disease by activating SIRT1 and PGC-1alpha. *Cell* 127: 1109–22.
- Mori TA, Bao DQ, Burke V, Puddey IB, Watts GF, et al. (1999) Dietary fish as a major component of a weight-loss diet: effect on serum lipids, glucose, and insulin metabolism in overweight hypertensive subjects. *Am J Clin Nutr* 70: 817–25.
- Kao YH, Chang HH, Lee MJ, Chen CL (2006) Tea, obesity, and diabetes. *Mol Nutr Food Res* 50: 188–210.
- Maeda H, Hosokawa M, Sashima T, Funayama K, Miyashita K (2005) Fucoxanthin from edible seaweed, *Undaria pinnatifida*, shows antiobesity effect through UCP1 expression in white adipose tissues. *Biochem Biophys Res Commun* 332: 392–7.
- Gesta S, Tseng YH, Kahn CR (2007) Developmental origin of fat: tracking obesity to its source. *Cell* 131: 242–56.
- Tchoukalova YD, Votruba SB, Tchkonja T, Giorgadze N, Kirkland JL, et al. (2010) Regional differences in cellular mechanisms of adipose tissue gain with overfeeding. *Proc Natl Acad Sci U S A* 107: 18226–31.
- Lowell BB (1999) PPARgamma: an essential regulator of adipogenesis and modulator of fat cell function. *Cell* 99: 239–242.
- Deutsch L (2007) Evaluation of the effect of Neptune Krill Oil on chronic inflammation and arthritic symptoms. *J Am Coll Nutr* 26: 39–48.
- Bunea R, El Farrah K, Deutsch L (2004) Evaluation of the effects of Neptune Krill Oil on the clinical course of hyperlipidemia. *Altern Med Rev* 9: 420–8.
- Zhu JJ, Shi JH, Qian WB, Cai ZZ, Li D (2008) Effects of krill oil on serum lipids of hyperlipidemic rats and human SW480 cells. *Lipids Health Dis* 7: 30.
- Tandy S, Chung RW, Wat E, Kamili A, Berge K, et al. (2009) Dietary krill oil supplementation reduces hepatic steatosis, glycemia, and hypercholesterolemia in high-fat-fed mice. *J Agric Food Chem* 57: 9339–45.
- Ierna M, Kerr A, Scales H, et al. (2010) Supplementation of diet with krill oil protects against experimental rheumatoid arthritis. *BMC musculoskeletal disorders* 11: 136.
- Batetta B, Griinari M, Carta G, et al. (2009) Endocannabinoids may mediate the ability of (n-3) fatty acids to reduce ectopic fat and inflammatory mediators in obese Zucker rats. *J Nutr* 139: 1495–1501.
- Ferramosca A, Conte L, Zara V (2011) A krill oil supplemented diet reduces the activities of the mitochondrial tricarboxylate carrier and of the cytosolic lipogenic enzymes in rats. *Journal of animal physiology and animal nutrition*.
- Guo W, Zhang KM, Tu K, Li YX, Zhu L, et al. (2009) Adipogenesis licensing and execution are separately linked to cell proliferation. *Cell Res* 19: 216–23.
- Sarruf DA, Iankova I, Abella A, Assou S, Miard S, et al. (2005) Cyclin D3 promotes adipogenesis through activation of peroxisome proliferator-activated receptor gamma. *Mol Cell Biol* 25: 9985–95.
- Zandbergen F, Mandard S, Escher P, Tan NS, Patsouris D, et al. (2005) The G0/G1 switch gene 2 is a novel PPAR target gene. *Biochem J* 392: 313–24.
- Zhu Y, Qi C, Korenberg JR, Chen XN, Noya D, et al. (1995) Structural organization of mouse peroxisome proliferator-activated receptor gamma (mPPAR gamma) gene: alternative promoter use and different splicing yield two mPPAR gamma isoforms. *Proc Natl Acad Sci U S A* 92: 7921–5.
- Tang QQ, Jiang MS, Lane MD (1999) Repressive effect of Sp1 on the C/EBPalpha gene promoter: role in adipocyte differentiation. *Mol Cell Biol* 19: 4855–65.
- Christy RJ, Kaestner KH, Geiman DE, Lane MD (1991) CCAAT/enhancer binding protein gene promoter: binding of nuclear factors during differentiation of 3T3-L1 preadipocytes. *Proc Natl Acad Sci U S A* 88: 2593–7.
- Lee G, Elwood F, McNally J, Weiszmann J, Lindstrom M, et al. (2002) T0070907, a selective ligand for peroxisome proliferator-activated receptor gamma, functions as an antagonist of biochemical and cellular activities. *J Biol Chem* 277: 19649–57.
- Kubota N, Terauchi Y, Miki H, Tamemoto H, Yamauchi T, et al. (1999) PPAR gamma mediates high-fat diet-induced adipocyte hypertrophy and insulin resistance. *Molecular Cell* 4: 597–609.
- Pelleymounter MA, Cullen MJ, Baker MB, Hecht R, Winters D, et al. (1995) Effects of the obese gene product on body weight regulation in ob/ob mice. *Science* 269: 540–3.
- Halaas JL, Gajiwala KS, Maffei M, Cohen SL, Chait BT, et al. (1995) Weight-reducing effects of the plasma protein encoded by the obese gene. *Science* 269: 543–6.
- Campfield LA, Smith EJ, Guisez Y, Devos R, Burn P (1995) Recombinant mouse OB protein: evidence for a peripheral signal linking adiposity and central neural networks. *Science* 269: 546–9.
- Yamauchi T, Kamon J, Waki H, Terauchi Y, Kubota N, et al. (2001) The fat-derived hormone adiponectin reverses insulin resistance associated with both lipodystrophy and obesity. *Nat Med* 7: 941–6.
- Tanaka T, Yoshida N, Kishimoto T, Akira S (1997) Defective adipocyte differentiation in mice lacking the C/EBPbeta and/or C/EBPdelta gene. *EMBO J* 16: 7432–43.
- Tong Q, Tsai J, Tan G, Dalgin G, Hotamisligil GS (2005) Interaction between GATA and the C/EBP family of transcription factors is critical in GATA-mediated suppression of adipocyte differentiation. *Mol Cell Biol* 25: 706–15.
- Rochford JJ, Semple RK, Laudes M, Boyle KB, Christodoulides C, et al. (2004) ETO/MTG8 is an inhibitor of C/EBPbeta activity and a regulator of early adipogenesis. *Mol Cell Biol* 24: 9863–72.
- Okamura M, Kudo H, Wakabayashi K, Tanaka T, Nonaka A, et al. (2009) COUP-TFII acts downstream of Wnt/beta-catenin signal to silence PPAR-gamma gene expression and repress adipogenesis. *Proc Natl Acad Sci U S A* 106: 5819–24.
- Hutley L, Shurety W, Newell F, McGeary R, Pelton N, et al. (2004) Fibroblast growth factor 1: a key regulator of human adipogenesis. *Diabetes* 53: 3097–106.
- Prusty D, Park BH, Davis KE, Farmer SR (2002) Activation of MEK/ERK signaling promotes adipogenesis by enhancing peroxisome proliferator-activated receptor gamma (PPARgamma) and C/EBPalpha gene expression during the differentiation of 3T3-L1 preadipocytes. *J Biol Chem* 277: 46226–32.
- Sakaue H, Konishi M, Ogawa W, Asaki T, Mori T, et al. (2002) Requirement of fibroblast growth factor 10 in development of white adipose tissue. *Genes Dev* 16: 908–12.
- Widberg CH, Newell FS, Bachmann AW, Ramnøruth SN, Spelta MC, et al. (2009) Fibroblast growth factor receptor 1 is a key regulator of early adipogenic events in human preadipocytes. *Am J Physiol Endocrinol Metab* 296: E121–31.
- Hong KM, Belperio JA, Keane MP, Burdick MD, Strieter RM (2007) Differentiation of human circulating fibrocytes as mediated by transforming growth factor-beta and peroxisome proliferator-activated receptor gamma. *J Biol Chem* 282: 22910–20.
- Tou JC, Jaczynski J, Chen YC (2007) Krill for human consumption: nutritional value and potential health benefits. *Nutrition reviews* 65: 63–77.
- Gigliotti JC, Smith AL, Jaczynski J, et al. (2011) Consumption of krill protein concentrate prevents early renal injury and nephrocalcinosis in female Sprague-Dawley rats. *Urol Res* 39: 59–67.
- Bridges KM, Gigliotti JC, Altman S, et al. (2010) Determination of digestibility, tissue deposition, and metabolism of the omega-3 fatty acid content of krill protein concentrate in growing rats. *Journal of agricultural and food chemistry* 58: 2830–2837.
- Ulven SM, Kirkhus B, Lamglait A, et al. (2011) Metabolic effects of krill oil are essentially similar to those of fish oil but at lower dose of EPA and DHA, in healthy volunteers. *Lipids* 46: 37–46.
- Kidd PM (2007) Omega-3 DHA and EPA for cognition, behavior, and mood: clinical findings and structural-functional synergies with cell membrane phospholipids. *Altern Med Rev* 12: 207–227.
- Matsumura H, Reich S, Ito A, Saitoh H, Kamoun S, et al. (2003) Gene expression analysis of plant host-pathogen interactions by SuperSAGE. *Proc Natl Acad Sci U S A* 100: 15718–23.
- Matsumura H, Ito A, Saitoh H, Winter P, Kahl G, et al. (2005) SuperSAGE. *Cell Microbiol* 7: 11–8.
- Matsumura H, Yoshida K, Luo S, Kimura E, Fujibe T, et al. (2010) High-throughput SuperSAGE for digital gene expression analysis of multiple samples using next generation sequencing. *PLoS One* 5: e121010.

**Author Contributions**

Conceived and designed the experiments: HY. Performed the experiments: HY. Analyzed the data: HY. Contributed reagents/materials/analysis tools: HY TU AY. Wrote the paper: HY.
